# Supplementary material for: 100 million years of multigene family evolution: origin and evolution of the avian MHC class IIB
Source: PubMed Central journal article supplement (PMC5470263; doi:10.1186/s12864-017-3839-7), 2017-06-13

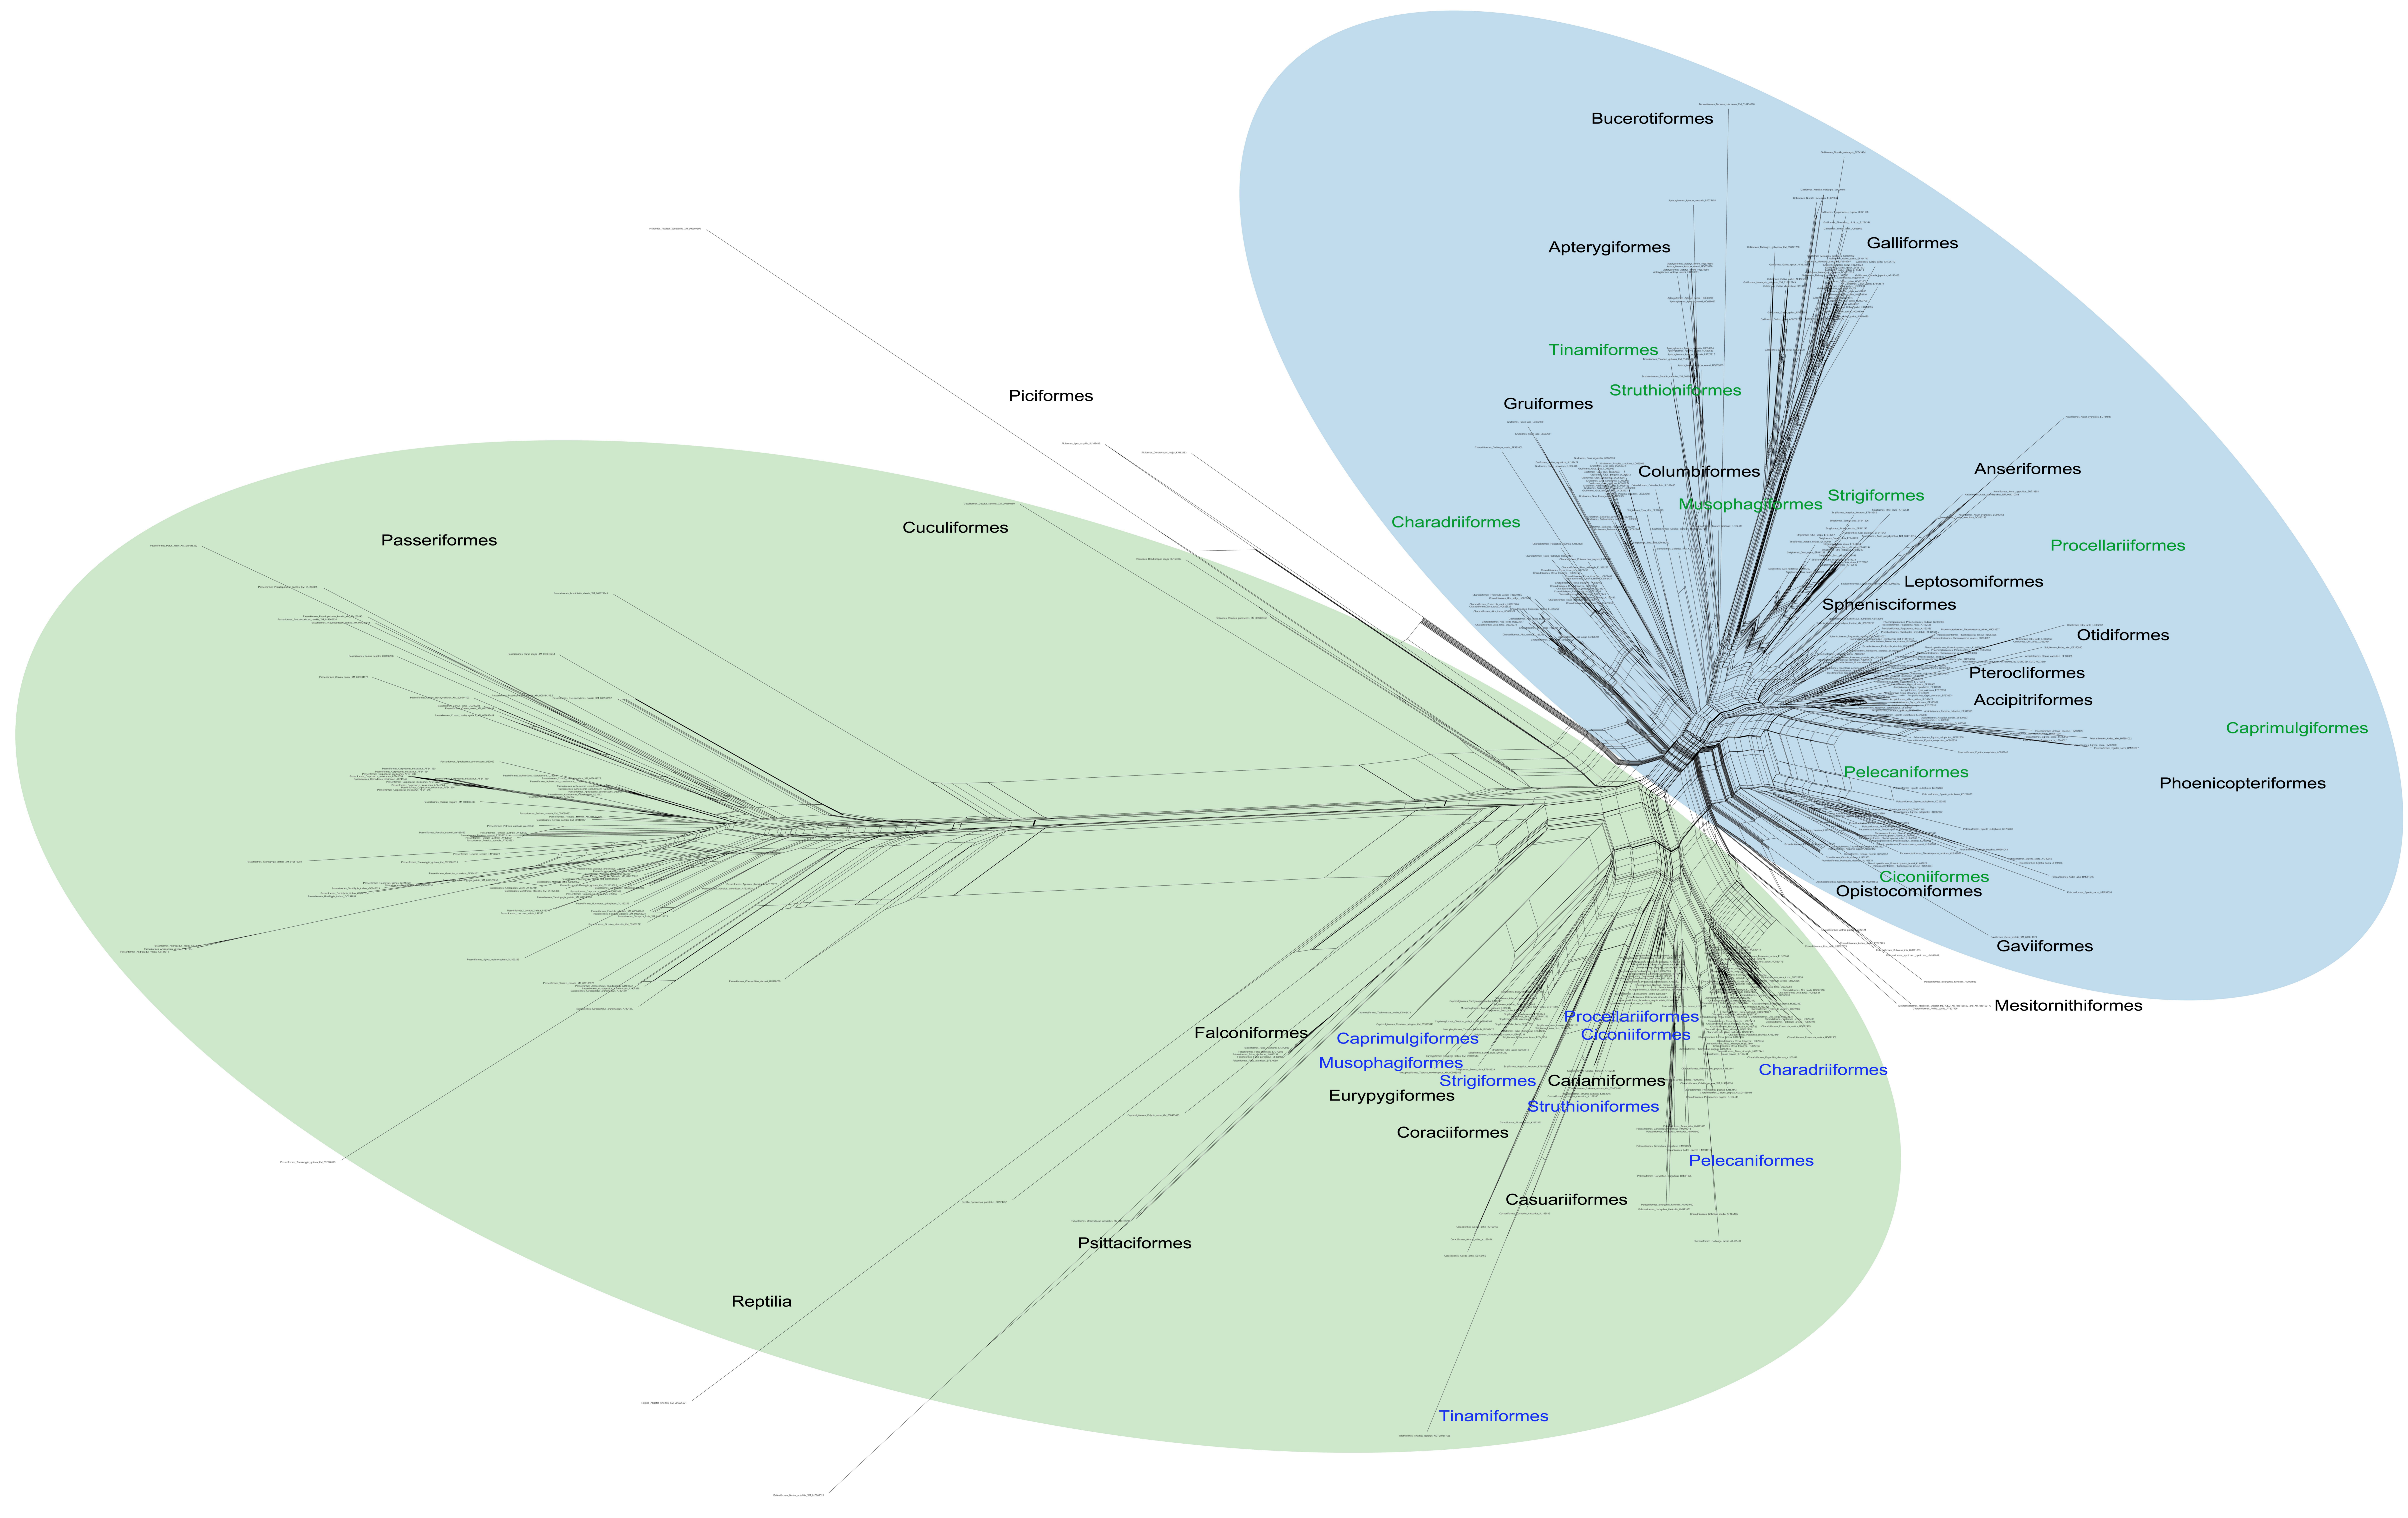

Supplement: 12864_2017_3839_MOESM3_ESM.pdf [file 12864_2017_3839_MOESM3_ESM.pdf]
