# Supplementary material for: 100 million years of multigene family evolution: origin and evolution of the avian MHC class IIB
Source: PubMed Central journal article supplement (PMC5470263; doi:10.1186/s12864-017-3839-7), 2017-06-13
Supplement: 12864_2017_3839_MOESM5_ESM.pdf [file 12864_2017_3839_MOESM5_ESM.pdf]

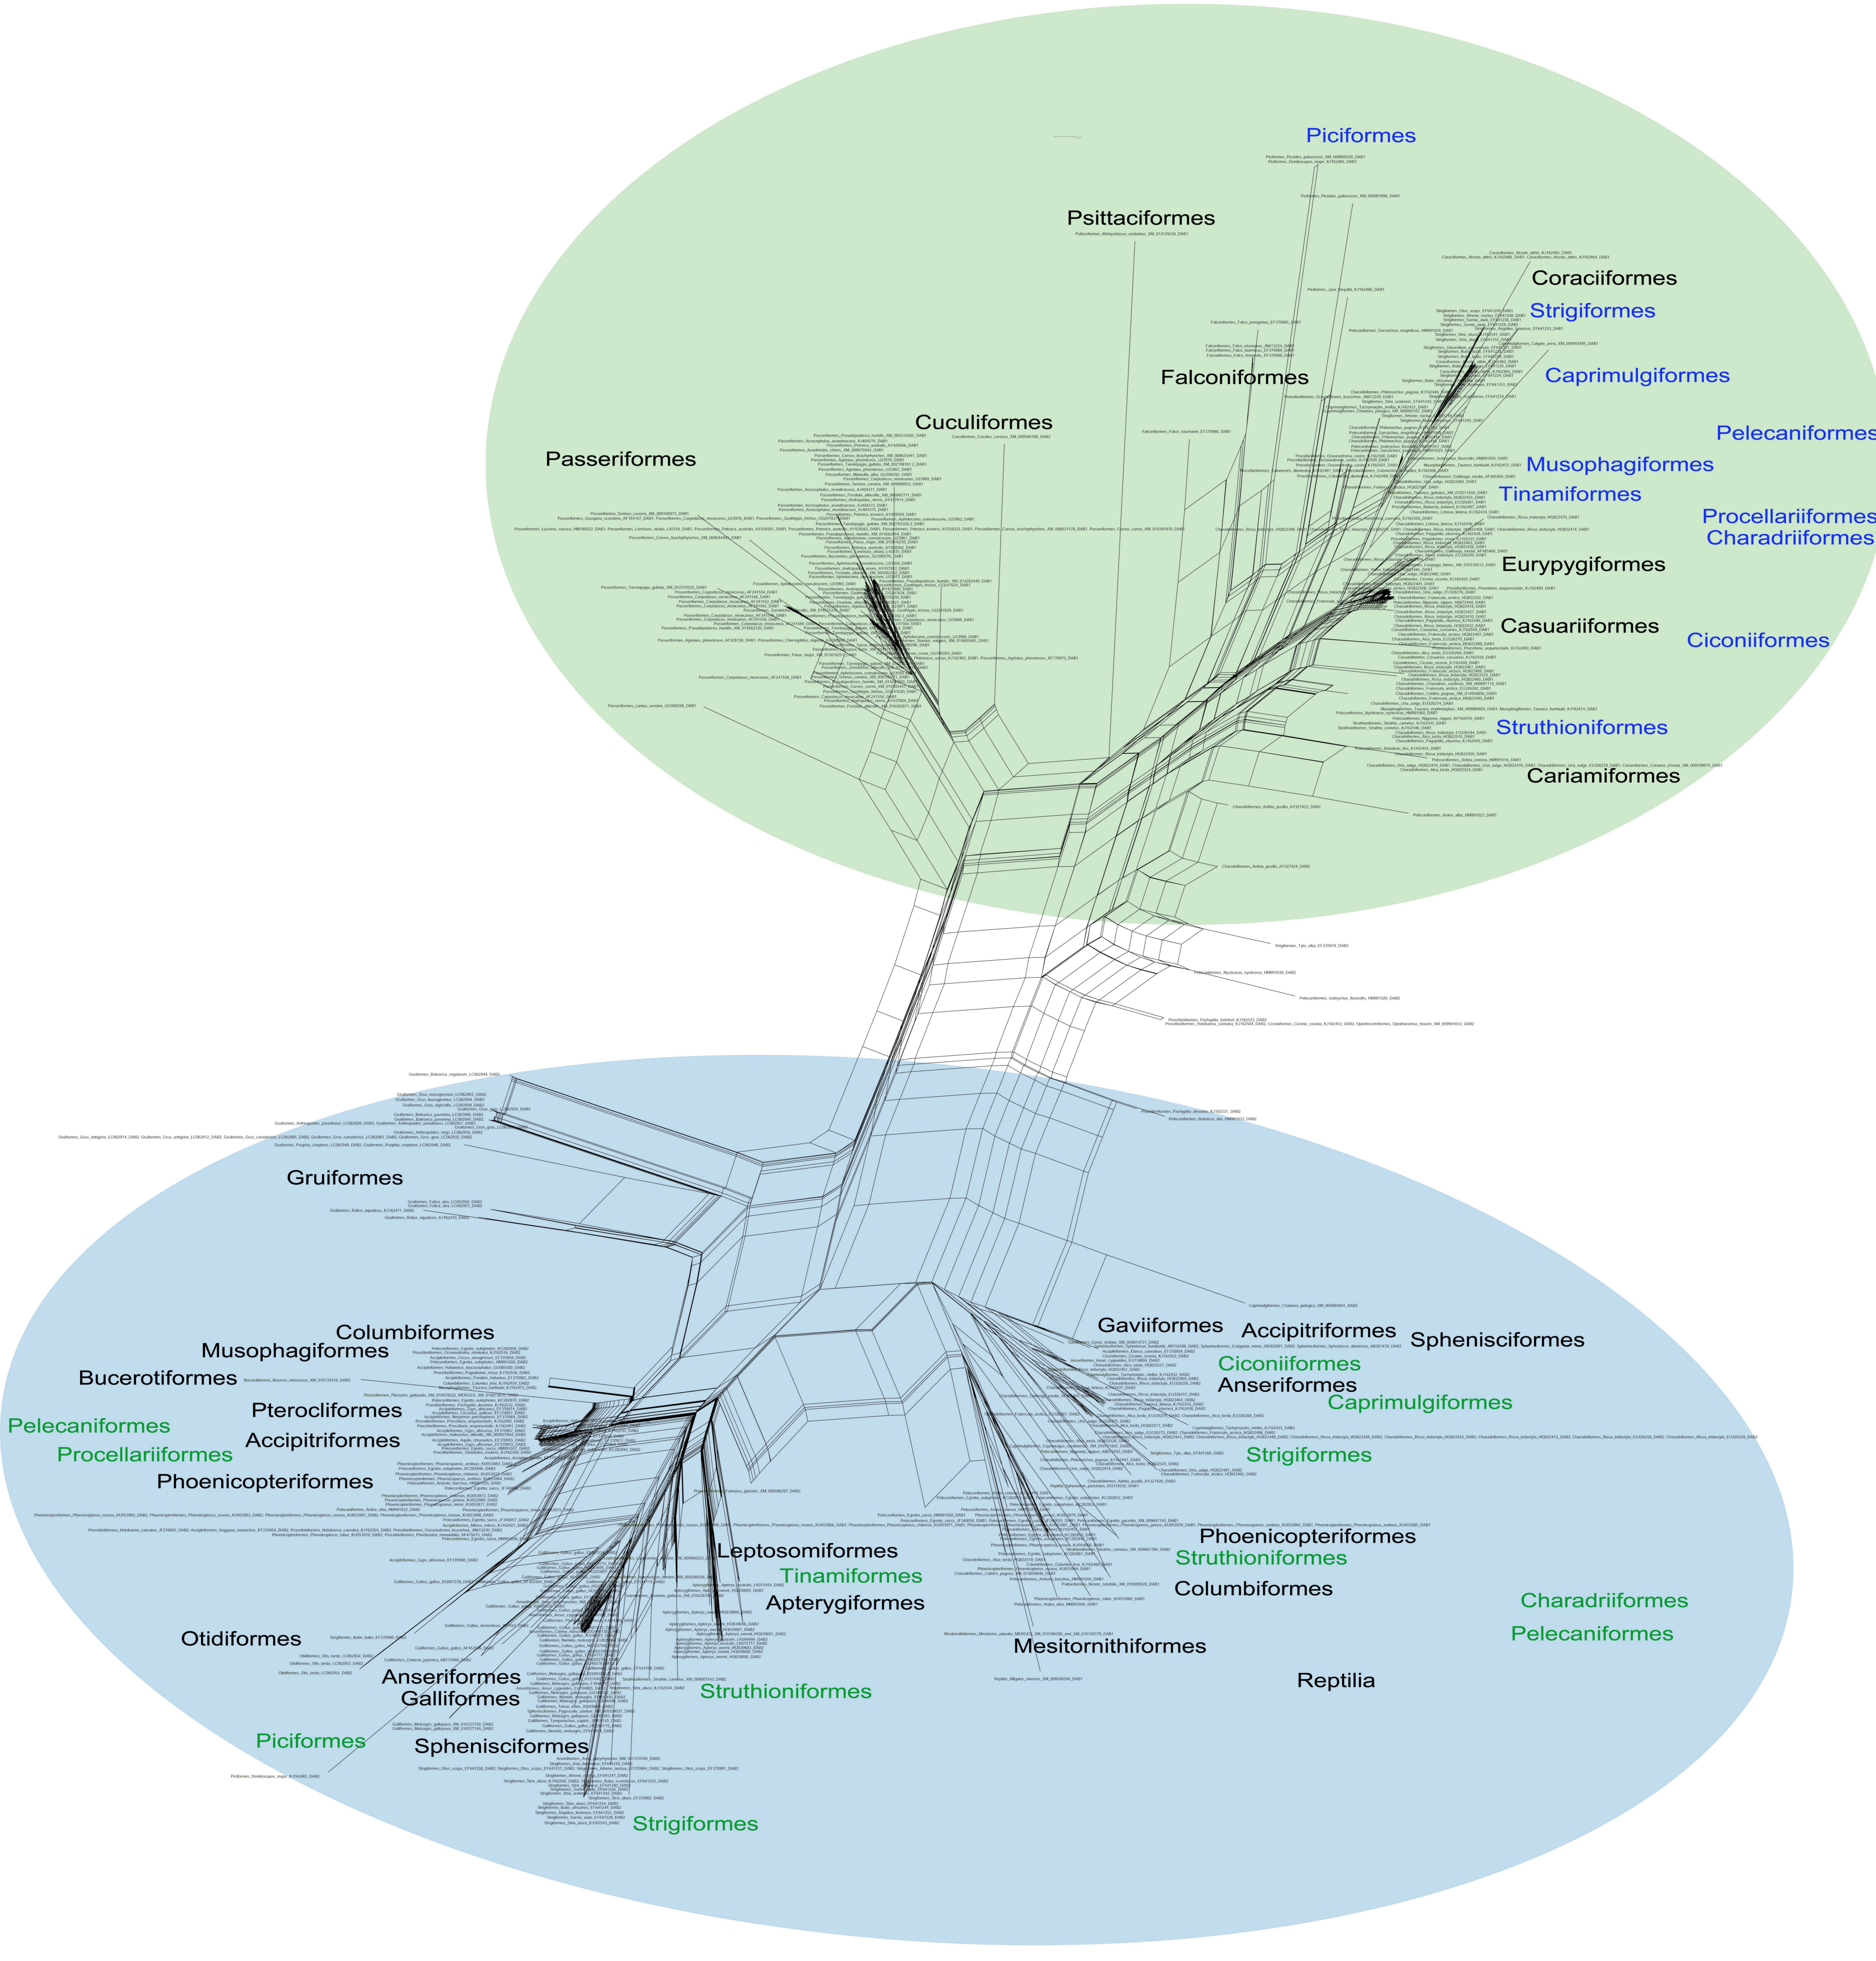

Piciformes

Psittaciformes

Coraciiformes

Strigiformes

Caprimulgiformes

Falconiformes

Pelecaniformes

Musophagiformes

Tinamiformes

Procellariiformes

Charadriiformes

Cuculiformes

Passeriformes

Eurypygiformes

Casuariiformes

Ciconiiformes

Struthioniformes

Cariamiformes

Gruiformes

Musophagiformes

Bucerotiformes

Pelecaniformes

Procellariiformes

Pteroclitiformes

Accipitriformes

Phoenicopteriformes

Otidiformes

Anseriformes

Galliformes

Piciformes

Sphenisciformes

Strigiformes

Gaviiformes

Accipitriformes

Ciconiiformes

Anseriformes

Caprimulgiformes

Strigiformes

Phoenicopteriformes

Struthioniformes

Columbiformes

Mesornithiformes

Reptilia

Charadriiformes

Pelecaniformes

Sphenisciformes
