# Supplementary material for: 100 million years of multigene family evolution: origin and evolution of the avian MHC class IIB
Source: PubMed Central journal article supplement (PMC5470263; doi:10.1186/s12864-017-3839-7), 2017-06-13
Supplement: 12864_2017_3839_MOESM9_ESM.pdf [file 12864_2017_3839_MOESM9_ESM.pdf]

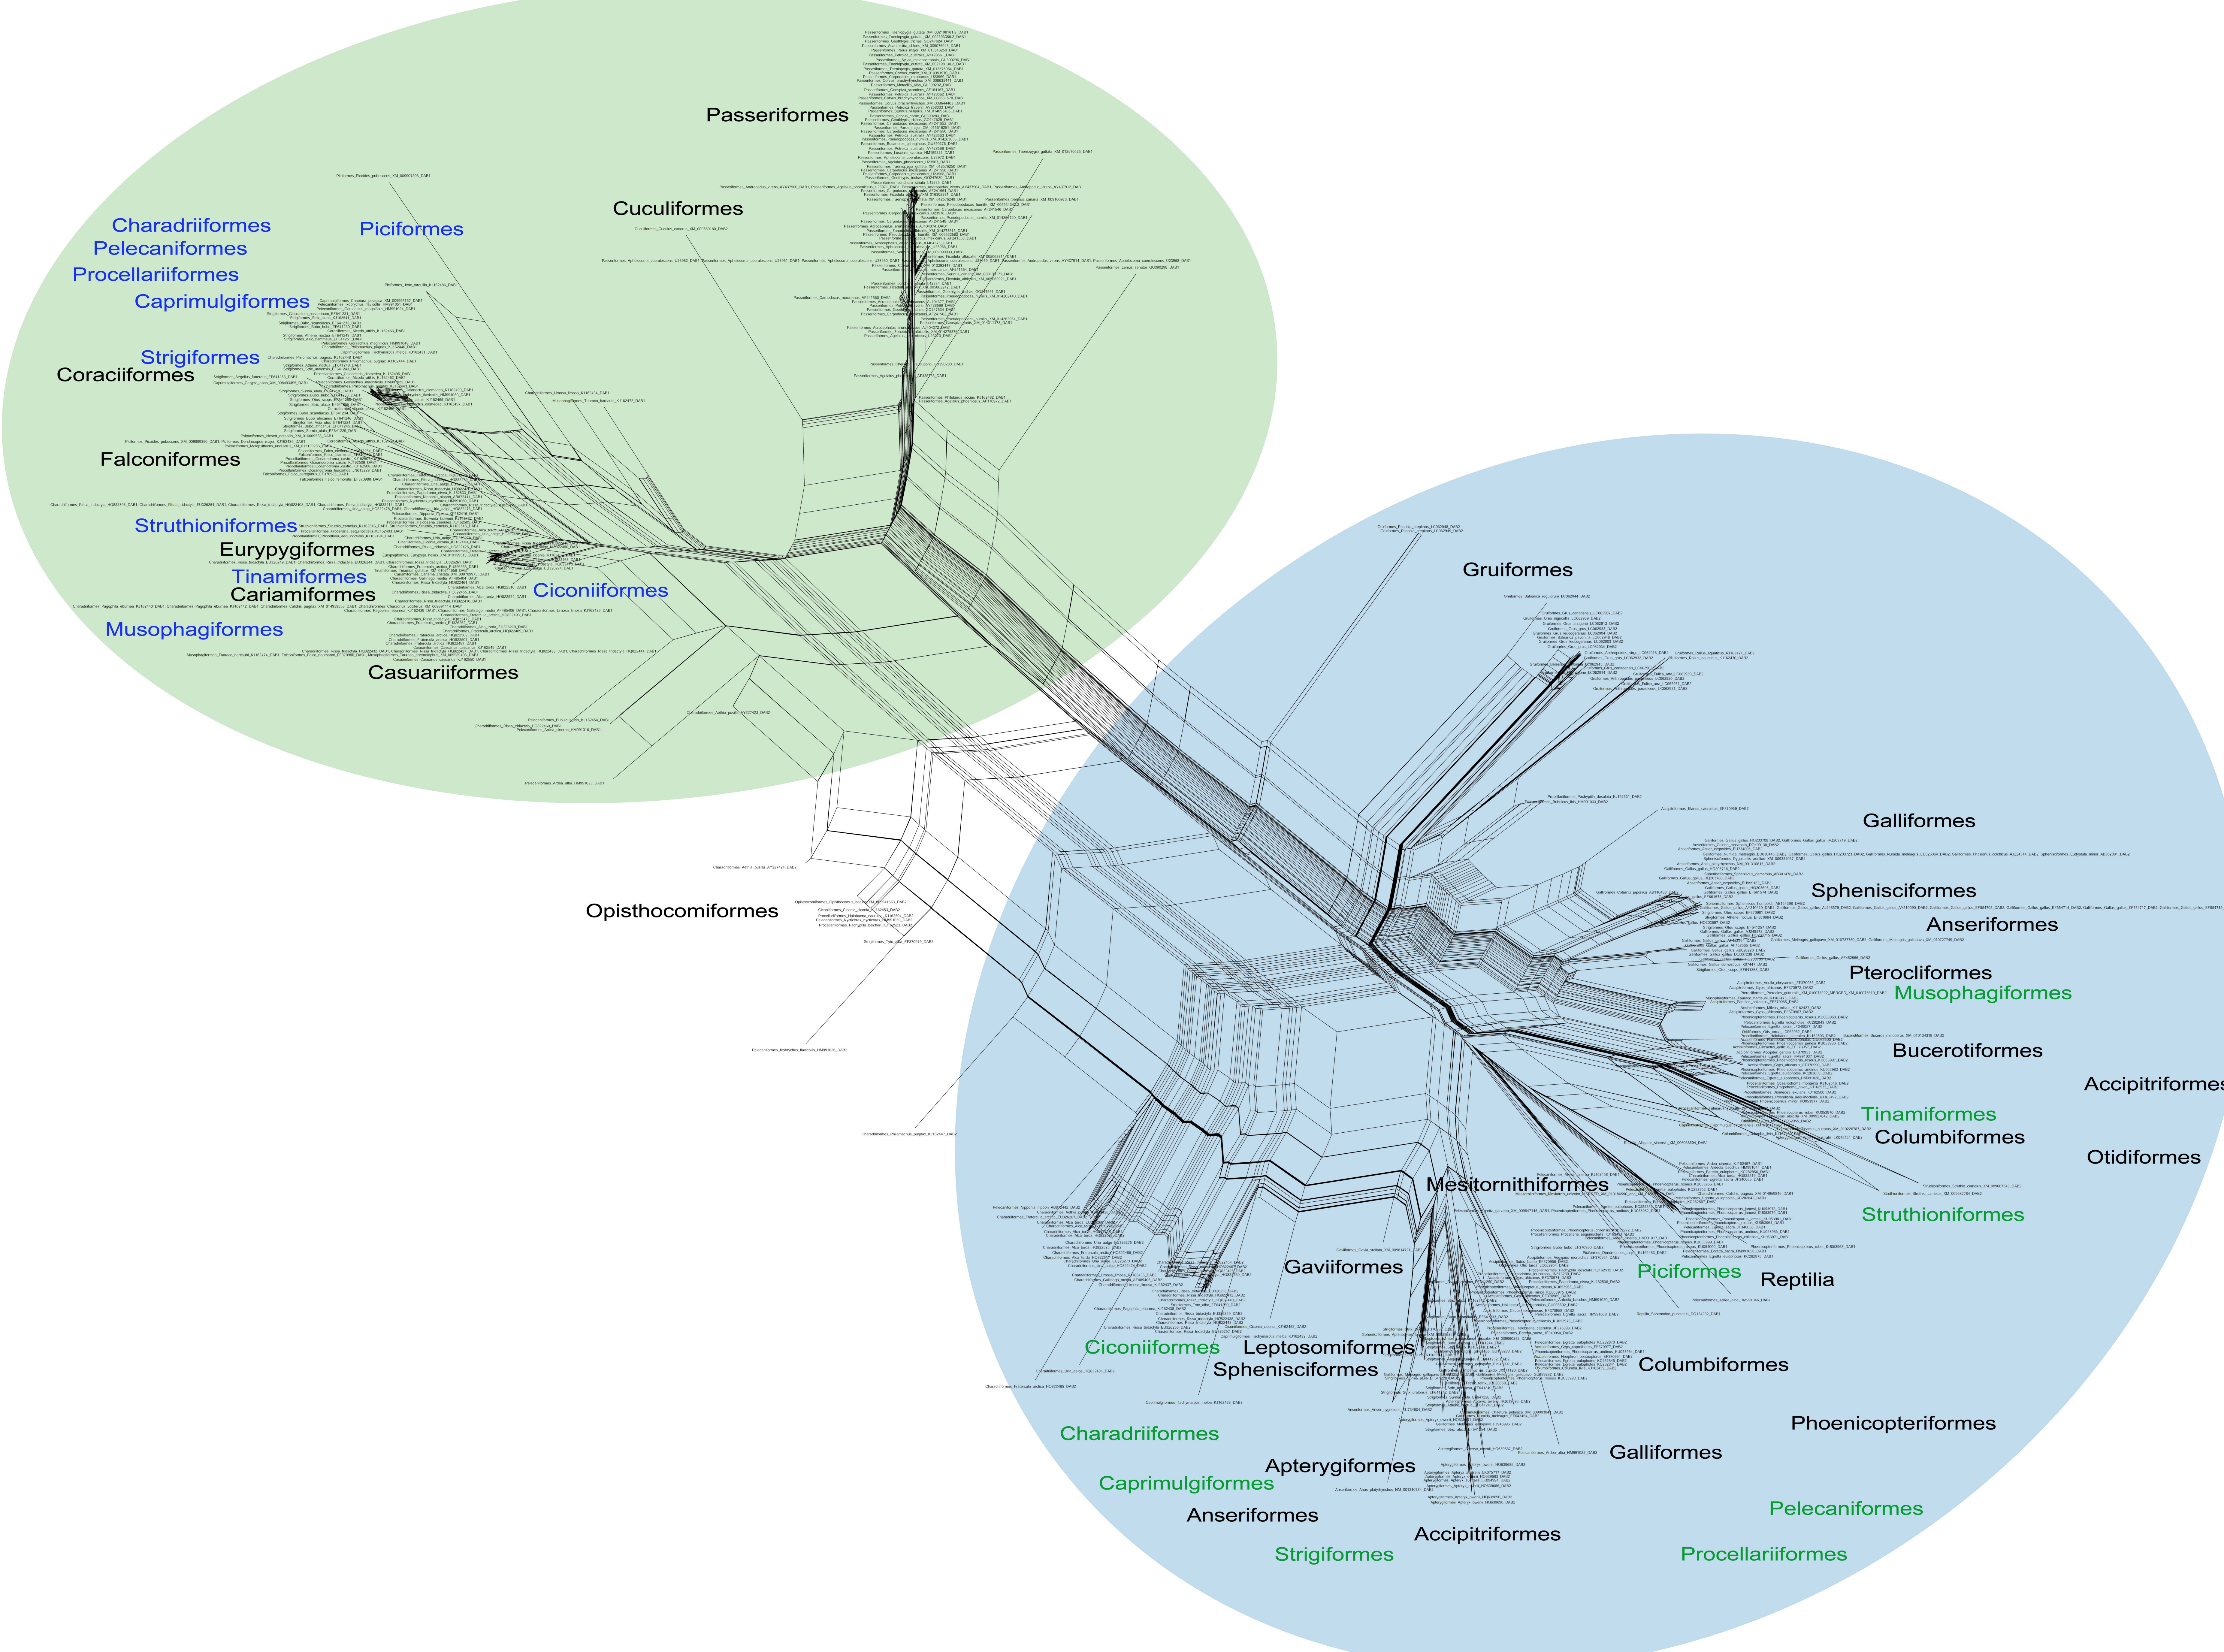

Passeriformes

Cuculiformes

Piciformes

Charadriiformes  
Pelecaniformes  
Procellariiformes  
Caprimulgiformes

Strigiformes  
Coraciiformes

Falconiformes

Struthioniformes

Eurypygiformes

Tinamiformes  
Cariamiformes

Musophagiformes

Casuariiformes

Ciconiiformes

Opisthocomiformes

Gruiformes

Galliformes

Sphenisciformes

Anseriformes

Pteroclitiformes

Musophagiformes

Bucerotiformes

Accipitriformes

Tinamiformes

Columbiformes

Otidiformes

Mesitornithiformes

Gaviiformes

Ciconiiformes

Leptosomiformes

Sphenisciformes

Charadriiformes

Caprimulgiformes

Anseriformes

Strigiformes

Piciformes

Reptilia

Columbiformes

Phoenicopteriformes

Galliformes

Pelecaniformes

Procellariiformes
